# Supplementary material for: PD-1 derived CA-170 is an oral immune checkpoint inhibitor that exhibits preclinical anti-tumor efficacy
Source: Springer Nature journal article supplement (doi:10.1038/s42003-021-02191-1), 2021-06-08
Supplement: MOESM3 [file 42003_2021_2191_MOESM3_ESM.pdf]

## **Description of Additional Supplementary Files**

**File name:** Supplementary Data 1

**Description:** Source data underlying Figure 1-5.
